# Supplementary material for: Bismuth oxide as a high capacity anode material for sodium-ion batteries
Source: Royal Society of Chemistry journal article supplement (doi:10.1039/c6cc06712c), 2016-01-01
Supplement: c6cc06712c1.pdf [file c6cc06712c1.pdf]

Electronic Supplementary Information (ESI) for Chem. Comm.  
This journal is © The Royal Society of Chemistry 2016

## Bismuth oxide as high capacity anode materials for sodium ion batteries

Min-kun Kim,<sup>‡</sup> Seung-Ho Yu,<sup>‡</sup> Aihua Jin, Jin Kim, In-Hwan Ko, Kug-Seung Lee, Junyoung Mun\*  
and Yung-Eun Sung\*

### Experimental

#### 1. *Characterization*

Field-emission scanning electron microscopy (FE-SEM) analysis was conducted with a SUPRA 55VP (Carl Zeiss). X-ray diffraction patterns were obtained using Bruker D-5005 with Cu  $k\alpha$  radiation. Scan range between 20 and 80 degree at 40 kV and 200 mA. X-ray absorption near edge structure (XANES) data were obtained at the 8C beamline of Pohang accelerator laboratory (PAL, Korea).

## ***2. Electrochemical characterization***

Bismuth oxide (No. 202827, 99.999%) and poly acrylic acid binder (PAA) was purchased from Aldrich. In order to prepare bismuth oxide and carbon composite, bismuth oxide and carbon (Super P) was mixed (7:3 in a weight ratio) and then ball-milled using PULVERISETTE 23. The rotation speed was 300 rpm and duration time was 12 hrs. The slurry for working electrode was composed of bismuth oxide, Super P and PAA binder in N-methyl-2-pyrrolidone (NMP). The prepared slurry was coated on the Al foil through doctor blade method. The electrode was dried at 120 °C for 8 hrs in a vacuum. 2032 type coin cells were assembled with sodium metal in argon filled glove box. Electrolyte was a 1 M NaClO<sub>4</sub> in ethylene carbonate (EC) and diethyl carbonate (DEC) (1:1 vol%). Fluoroethylene carbonate (FEC) was added in the electrolyte with 5 wt.%.

All electrochemical tests were measured by using WBCS3000 cyler (WonA Tech, Korea). The galvanostatical charging and discharging of the bismuth oxide/carbon composite electrode was carried out in the voltage range from 0.01 to 2.5V.

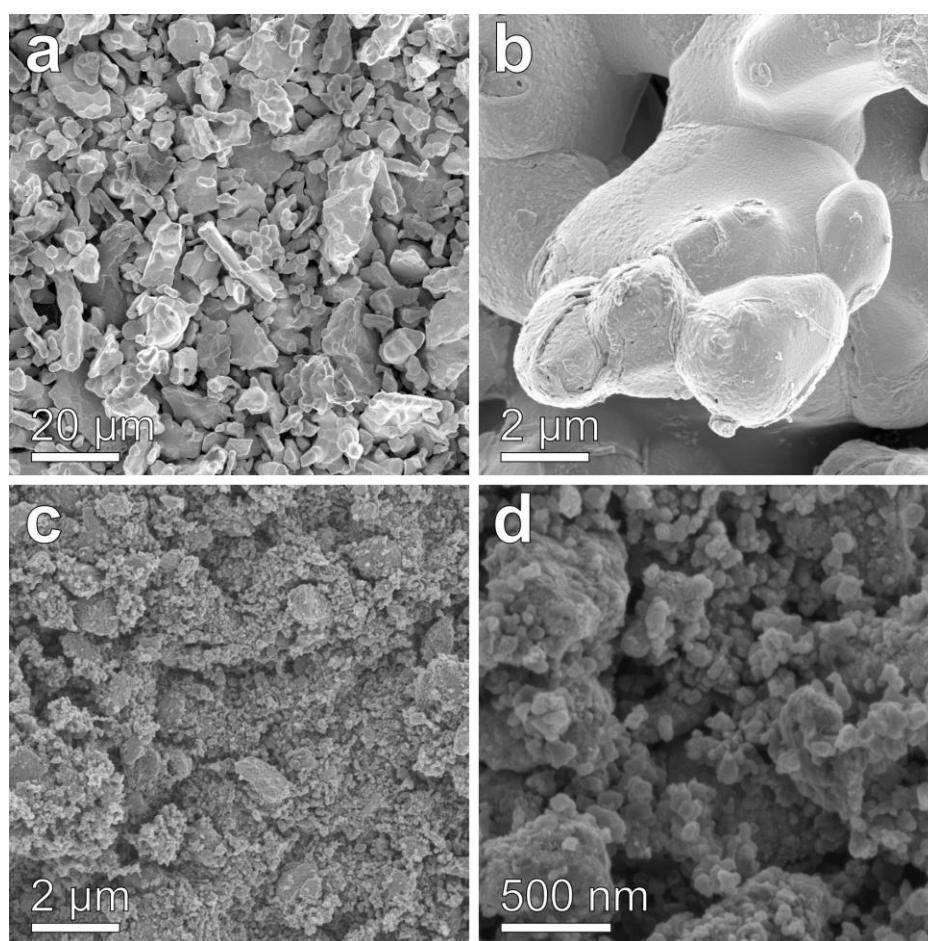

**Fig. S1.** SEM images of (a, b) pristine  $\text{Bi}_2\text{O}_3$  and (c, d)  $\text{Bi}_2\text{O}_3$ /carbon composites.

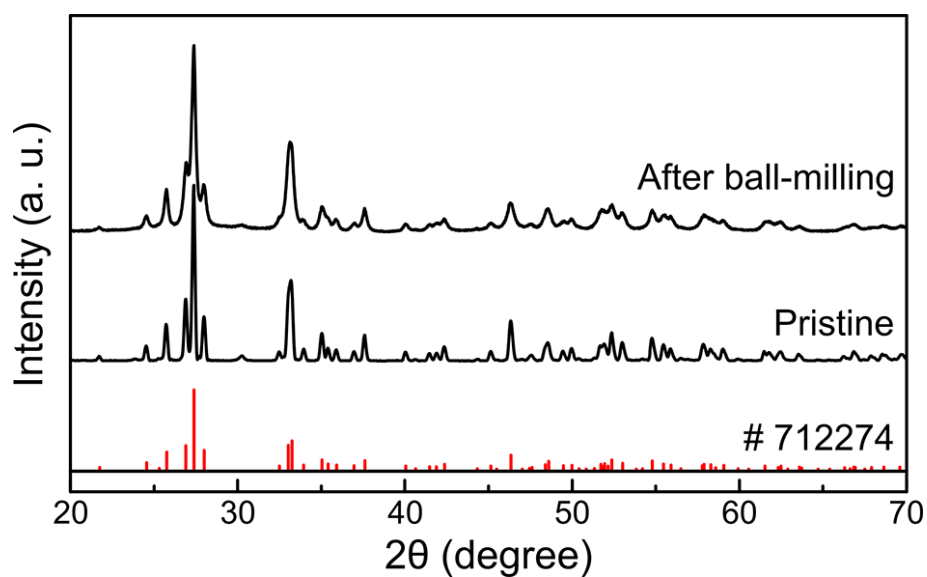

**Fig. S2.** XRD patterns of pristine  $\text{Bi}_2\text{O}_3$  and  $\text{Bi}_2\text{O}_3$ /carbon composites.

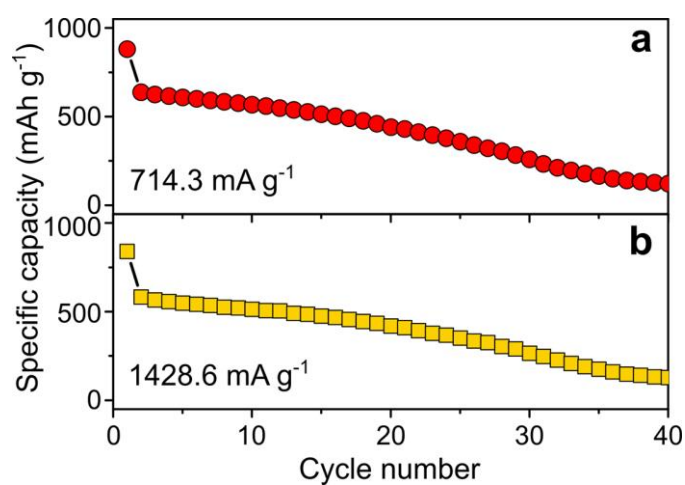

**Fig. S3.** Cycle performance of bismuth oxide/carbon composite at a current density of (a)  $714.3$  and (b)  $1428.6 \text{ mA g}^{-1}$  for 40 cycles.

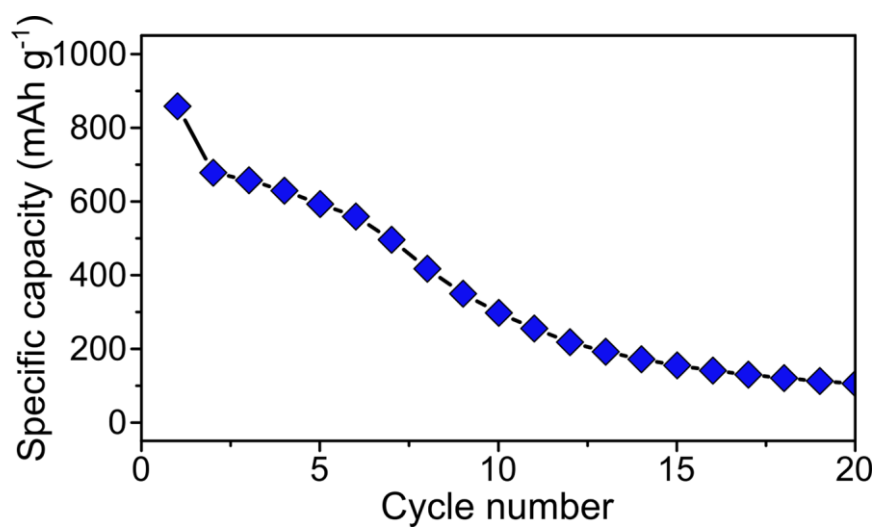

**Fig. S4.** Cycle performance of pristine  $\text{Bi}_2\text{O}_3$  at a current density of  $20 \text{ mA g}^{-1}$ .
